# Supplementary material
Source: ML conference proceedings conference paper supplement (https://openaccess.thecvf.com/content/WACV2024/html/Yuan_StreamMapNet_Streaming_Mapping_WACV_2024_paper.html)
Supplement: Supplementary file 1 [file Yuan_StreamMapNet_Streaming_Mapping_WACV_2024_supplemental.pdf]

# Supplementary Material

## A. Dataset Statistics

| Dataset    | Split    | Train ( $km^2$ ) | Val ( $km^2$ ) | Overlap ( $km^2$ ) / Ratio |
|------------|----------|------------------|----------------|----------------------------|
| Argoverse2 | Original | 3.46             | 1.04           | 0.56 / 54%                 |
|            | New      | 3.58             | 0.54           | <b>0.00 / 0%</b>           |
| NuScenes   | Original | 2.00             | 0.92           | 0.79 / 85%                 |
|            | New      | 1.64             | 0.54           | <b>0.06 / 11%</b>          |

Table 1. Summary of the cumulative areas of the training set, validation set, and their overlap in both datasets. The original splits of both datasets exhibit a high overlap ratio, a problem substantially mitigated by our suggested re-division.

In this supplementary material, we provide an in-depth analysis of the NuScenes [1] and Argoverse2 [3] datasets to further emphasize the necessity of re-splitting both datasets for the task of map construction.

Table 1 shows the cumulative areas of the training and validation sets and their overlap across different splits of both datasets. We query all locations within a 30,  $m$  radius circle from the ego-vehicle’s position.

In Argoverse2, the initial overlap ratio is 54%. By merging the training, validation, and testing sets together, we redivide them into a new train/validation split. We propose that an additional testing set is unnecessary, as all map data is publicly available. A fair testing set cannot be constructed if the ground-truth data is not hidden. Consequently, we divide the entire set of 1,000 scenes into a 700/150 train/validation split, ensuring a balanced distribution over objects, weathers, and cities, while completely eliminating any overlaps.

In NuScenes, more than 85% of locations in the validation set appear in the training set in the original split, which raises serious concerns about overfitting. However, the overlap ratio is reduced to 11% after using Roddick and Cipolla’s new split [2], substantially mitigating this issue.

## B. Dataset Visualization

To facilitate a more intuitive understanding, we visualize each city/district in both datasets, comparing the train/validation splits before and after the re-division. Figure 1, 2, 3, 4, 5, and 6 illustrate this comparison for Argoverse2. The *green* areas represent the training set, *blue* signifies the validation set, and *red* indicates the overlaps.

We maintain a balance between training and validation data across all six cities and ensure no overlaps. Figure 7, 8, 9, and 10 showcase the comparison for NuScenes. The original split results in a high degree of overlap, which the new split significantly alleviates.

Argoverse2 exhibits a significantly higher diversity of locations compared to NuScenes, which explains the performance gap observed in our experiments.

## References

- [1] Holger Caesar, Varun Bankiti, Alex H Lang, Sourabh Vora, Venice Erin Liong, Qiang Xu, Anush Krishnan, Yu Pan, Giancarlo Baldan, and Oscar Beijbom. nusenes: A multi-modal dataset for autonomous driving. In *Proceedings of the IEEE/CVF conference on computer vision and pattern recognition*, pages 11621–11631, 2020. 1
- [2] Thomas Roddick and Roberto Cipolla. Predicting semantic map representations from images using pyramid occupancy networks. In *Proceedings of the IEEE/CVF Conference on Computer Vision and Pattern Recognition*, pages 11138–11147, 2020. 1
- [3] Benjamin Wilson, William Qi, Tanmay Agarwal, John Lambert, Jagjeet Singh, Siddhesh Khandelwal, Bowen Pan, Ratanesh Kumar, Andrew Hartnett, Jhony Kaesemodel Pontes, Deva Ramanan, Peter Carr, and James Hays. Argoverse 2: Next generation datasets for self-driving perception and forecasting. In *Proceedings of the Neural Information Processing Systems Track on Datasets and Benchmarks (NeurIPS Datasets and Benchmarks 2021)*, 2021. 1

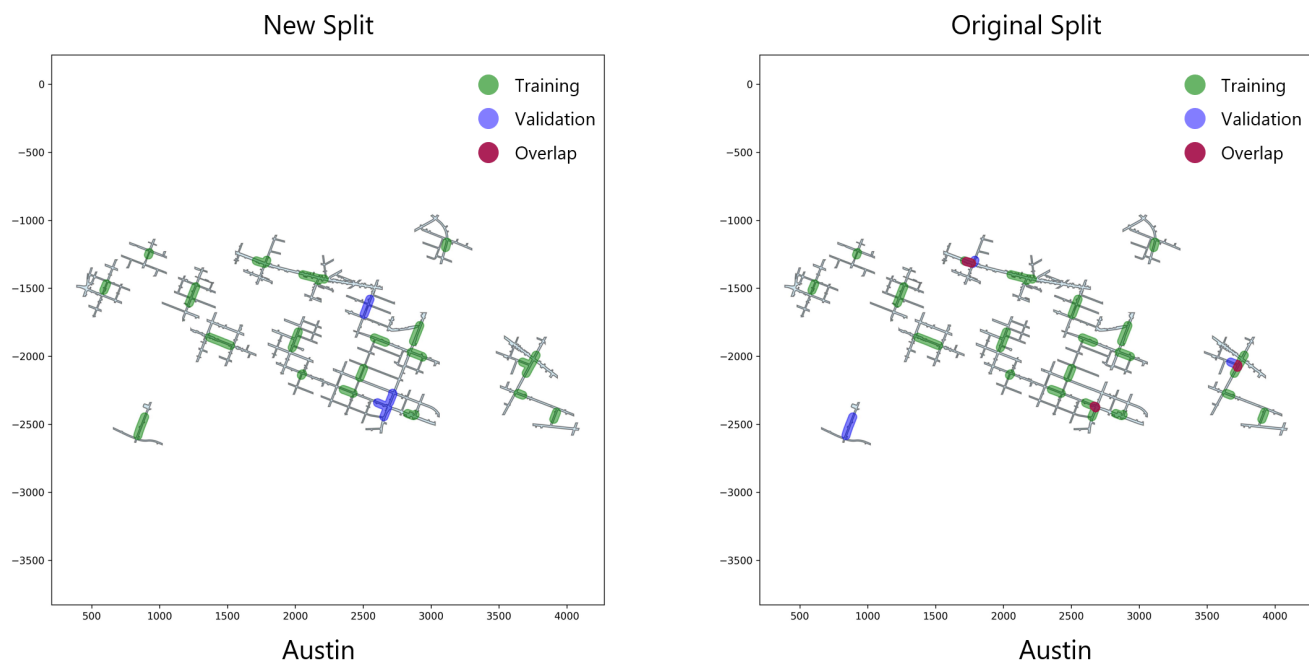

Figure 1. Comparison of the new and original splits in the Austin area of the Argoverse2 dataset. The *green* regions represent the training set, *blue* denotes the validation set, and *red* signifies the overlapping areas. Best viewed in color.

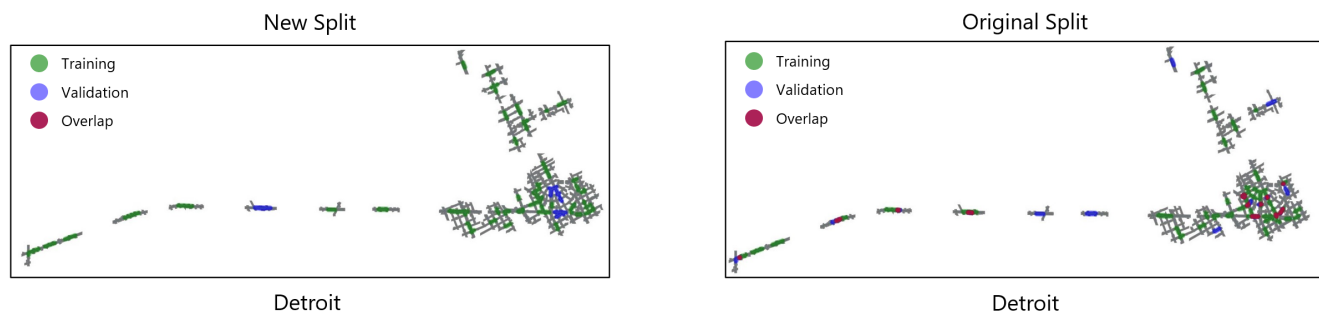

Figure 2. Comparison of the new and original splits in the Detroit area of the Argoverse2 dataset. The *green* regions represent the training set, *blue* denotes the validation set, and *red* signifies the overlapping areas. Best viewed in color.

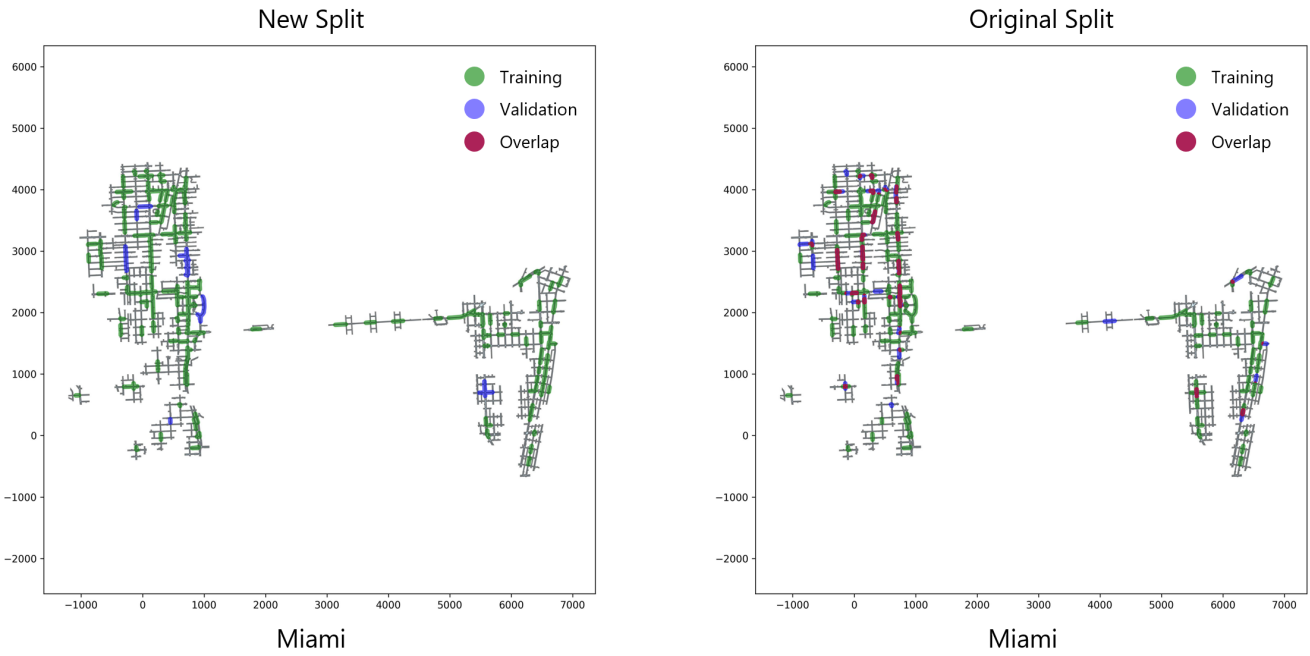

Figure 3. Comparison of the new and original splits in the Miami area of the Argoverse2 dataset. The *green* regions represent the training set, *blue* denotes the validation set, and *red* signifies the overlapping areas. Best viewed in color.

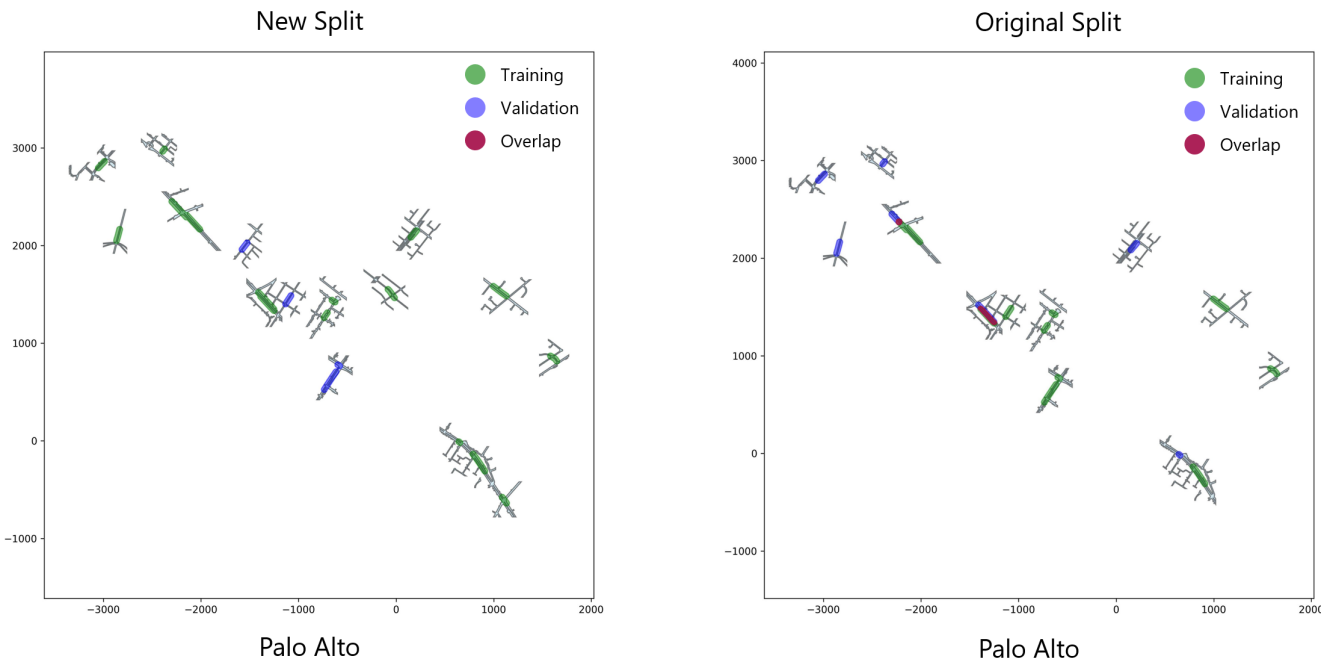

Figure 4. Comparison of the new and original splits in the Palo Alto area of the Argoverse2 dataset. The *green* regions represent the training set, *blue* denotes the validation set, and *red* signifies the overlapping areas. Best viewed in color.

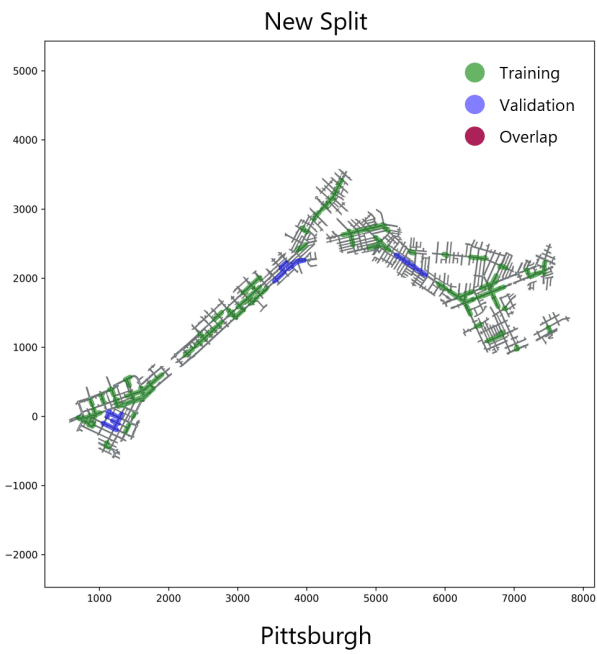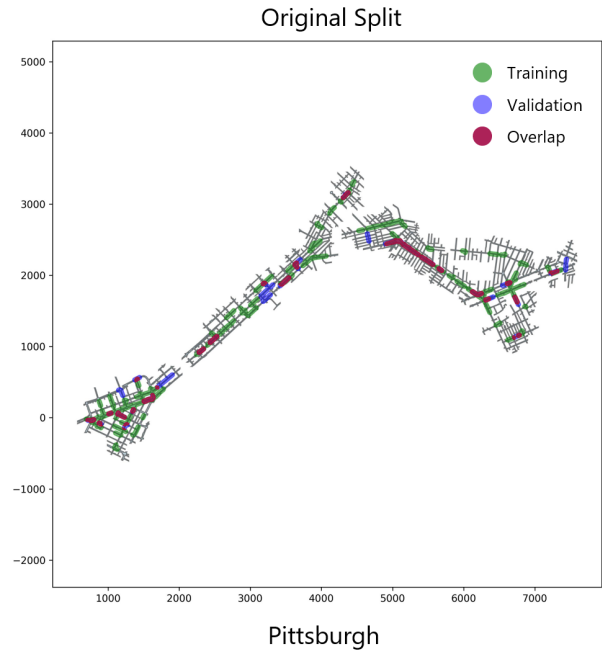

Figure 5. Comparison of the new and original splits in the Pittsburgh area of the Argoverse2 dataset. The *green* regions represent the training set, *blue* denotes the validation set, and *red* signifies the overlapping areas. Best viewed in color.

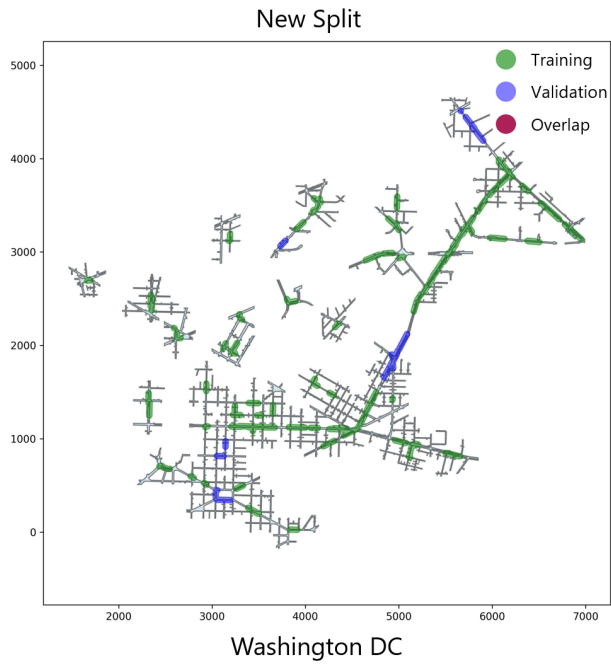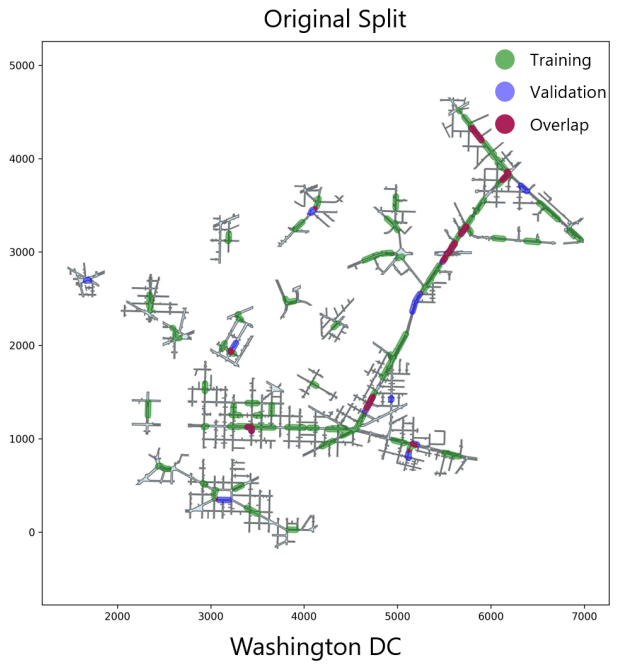

Figure 6. Comparison of the new and original splits in the Washington D.C. area of the Argoverse2 dataset. The *green* regions represent the training set, *blue* denotes the validation set, and *red* signifies the overlapping areas. Best viewed in color.

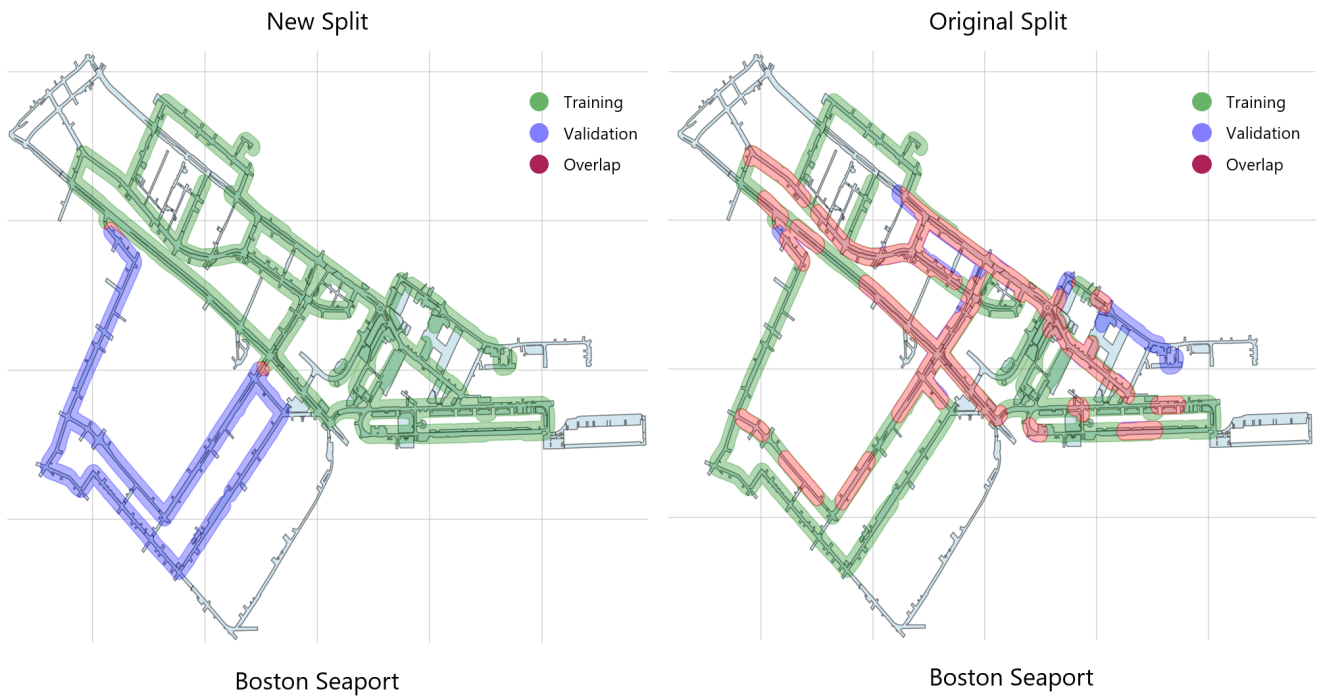

Figure 7. Comparison of the new and original splits in the Boston seaport area of the NuScenes dataset. The *green* regions represent the training set, *blue* denotes the validation set, and *red* signifies the overlapping areas. Best viewed in color.

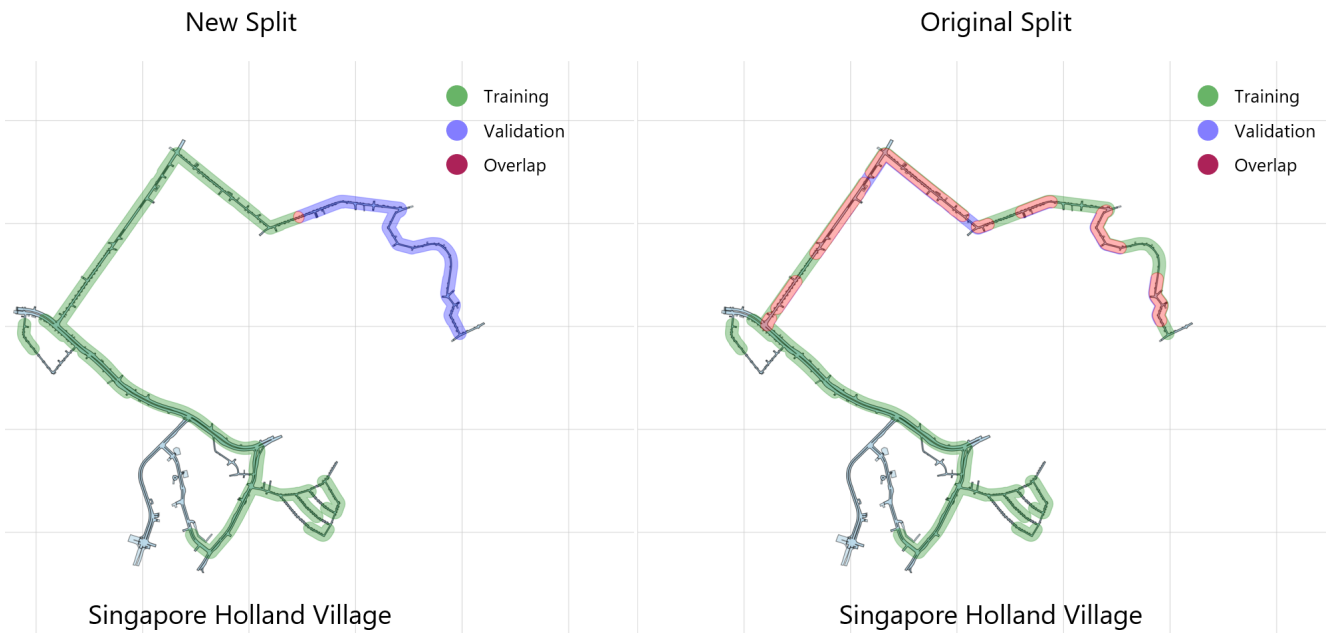

Figure 8. Comparison of the new and original splits in the Singapore Holland area of the NuScenes dataset. The *green* regions represent the training set, *blue* denotes the validation set, and *red* signifies the overlapping areas. Best viewed in color.

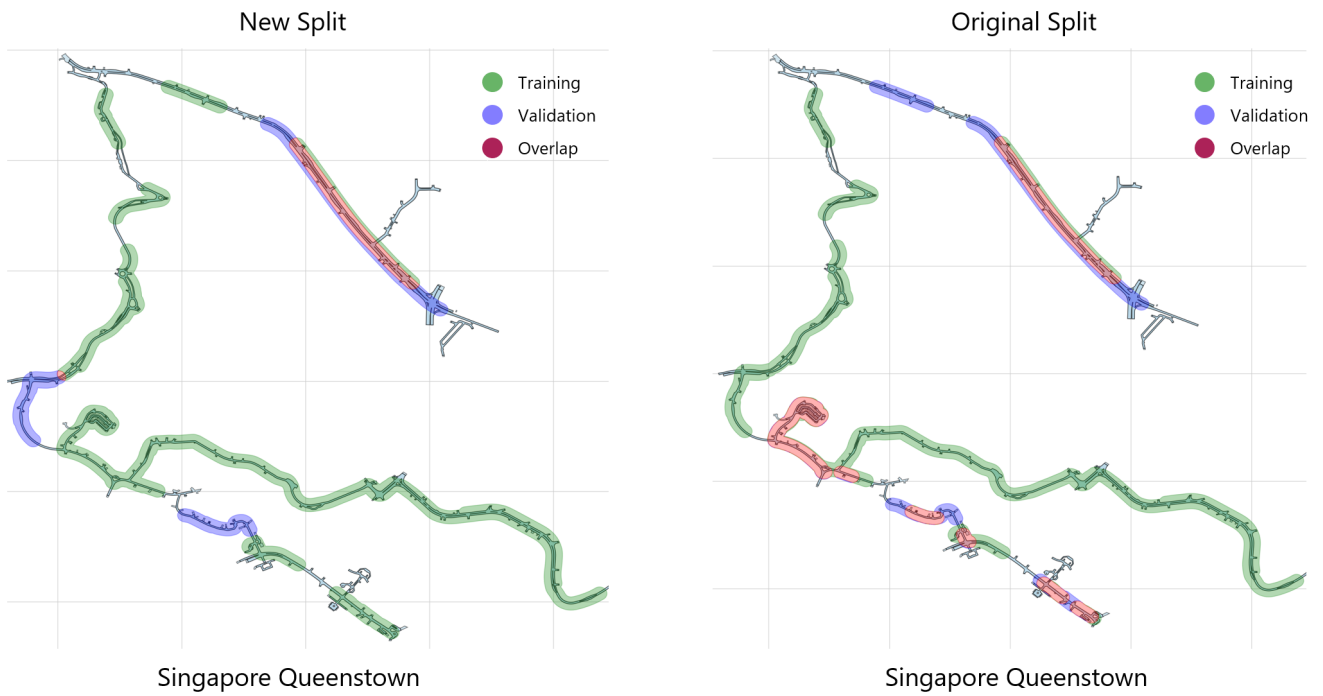

Figure 9. Comparison of the new and original splits in the Singapore Queenstown area of the NuScenes dataset. The *green* regions represent the training set, *blue* denotes the validation set, and *red* signifies the overlapping areas. Best viewed in color.

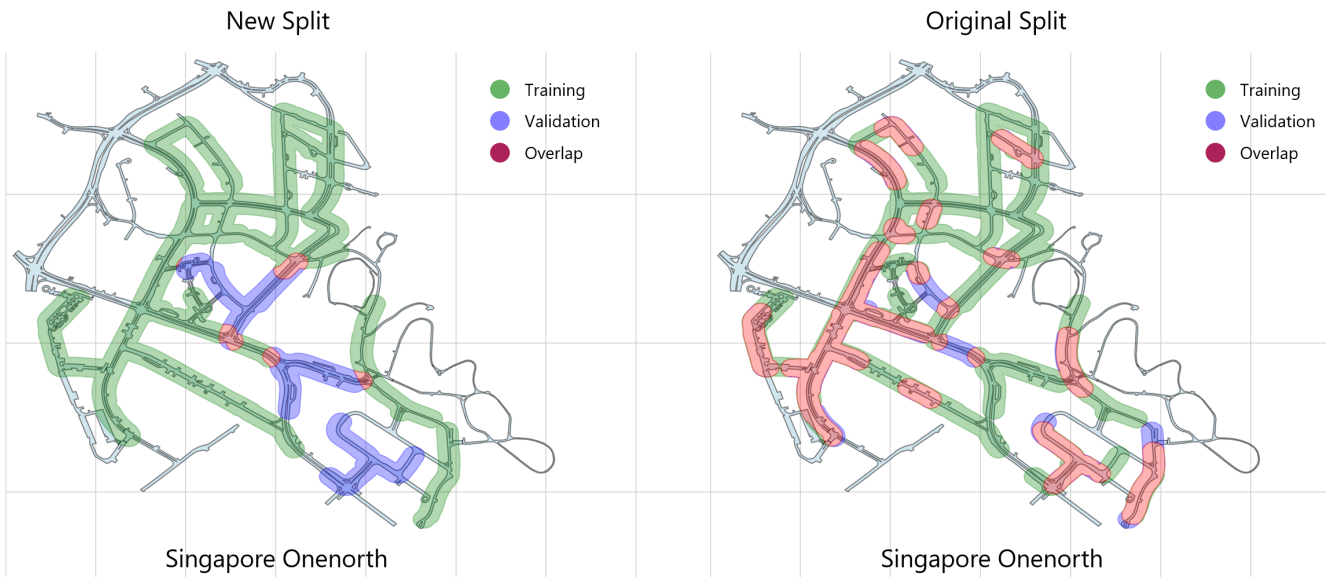

Figure 10. Comparison of the new and original splits in the Singapore One-North area of the NuScenes dataset. The *green* regions represent the training set, *blue* denotes the validation set, and *red* signifies the overlapping areas. Best viewed in color.
